# Supplementary material for: Relaxation of synaptic inhibitory events as a compensatory mechanism in fetal SOD spinal motor networks
Source: eLife journal article supplement (doi:10.7554/elife.51402), 2019-12-23
Supplement: supp [file elife-51402-supp-v1.zip]

Archive with 4 entries (4 files):
- elife_poa_e51402_Figure_1_figure_supplement_1.pdf
- elife_poa_e51402_Figure_6_figure_supplement_2.pdf
- elife_poa_e51402_Figure_6_figure_supplement_1.pdf
- elife_poa_e51402_Transparent_Reporting_File.pdf
