# Supplementary figures and images for: Relaxation of synaptic inhibitory events as a compensatory mechanism in fetal SOD spinal motor networks
Source: eLife journal article supplement (doi:10.7554/elife.51402), 2019-12-23

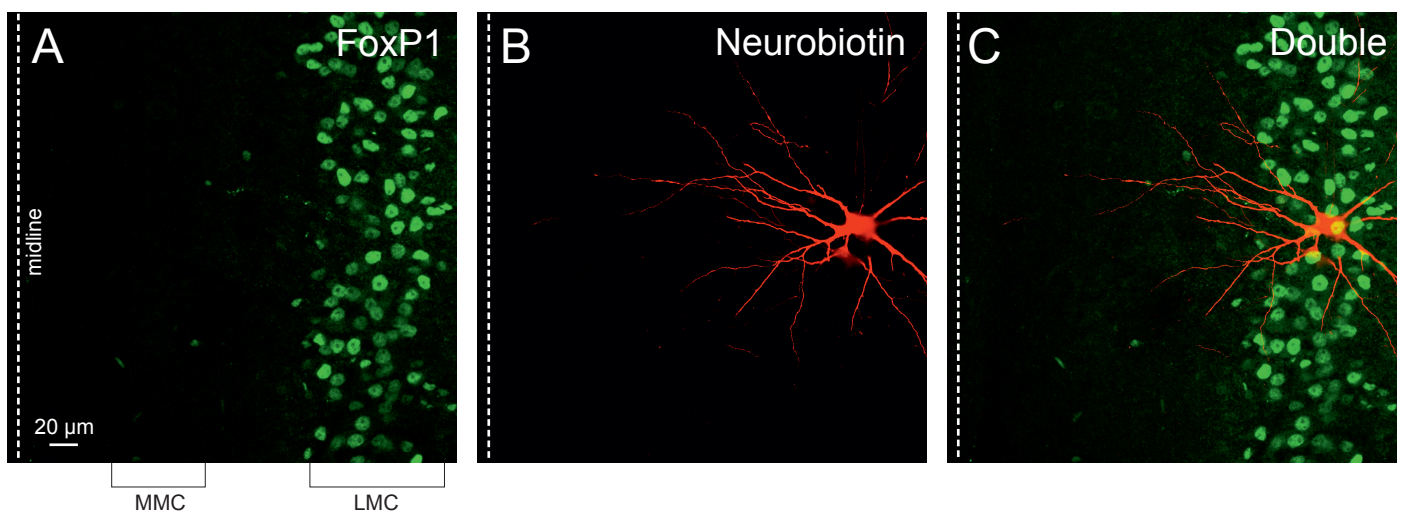

**Branchereau et al. Figure 1 - Suppl. Figure 1**

Supplement: supp [file elife-51402-supp-v1.zip › elife_poa_e51402_Figure_1_figure_supplement_1.pdf]

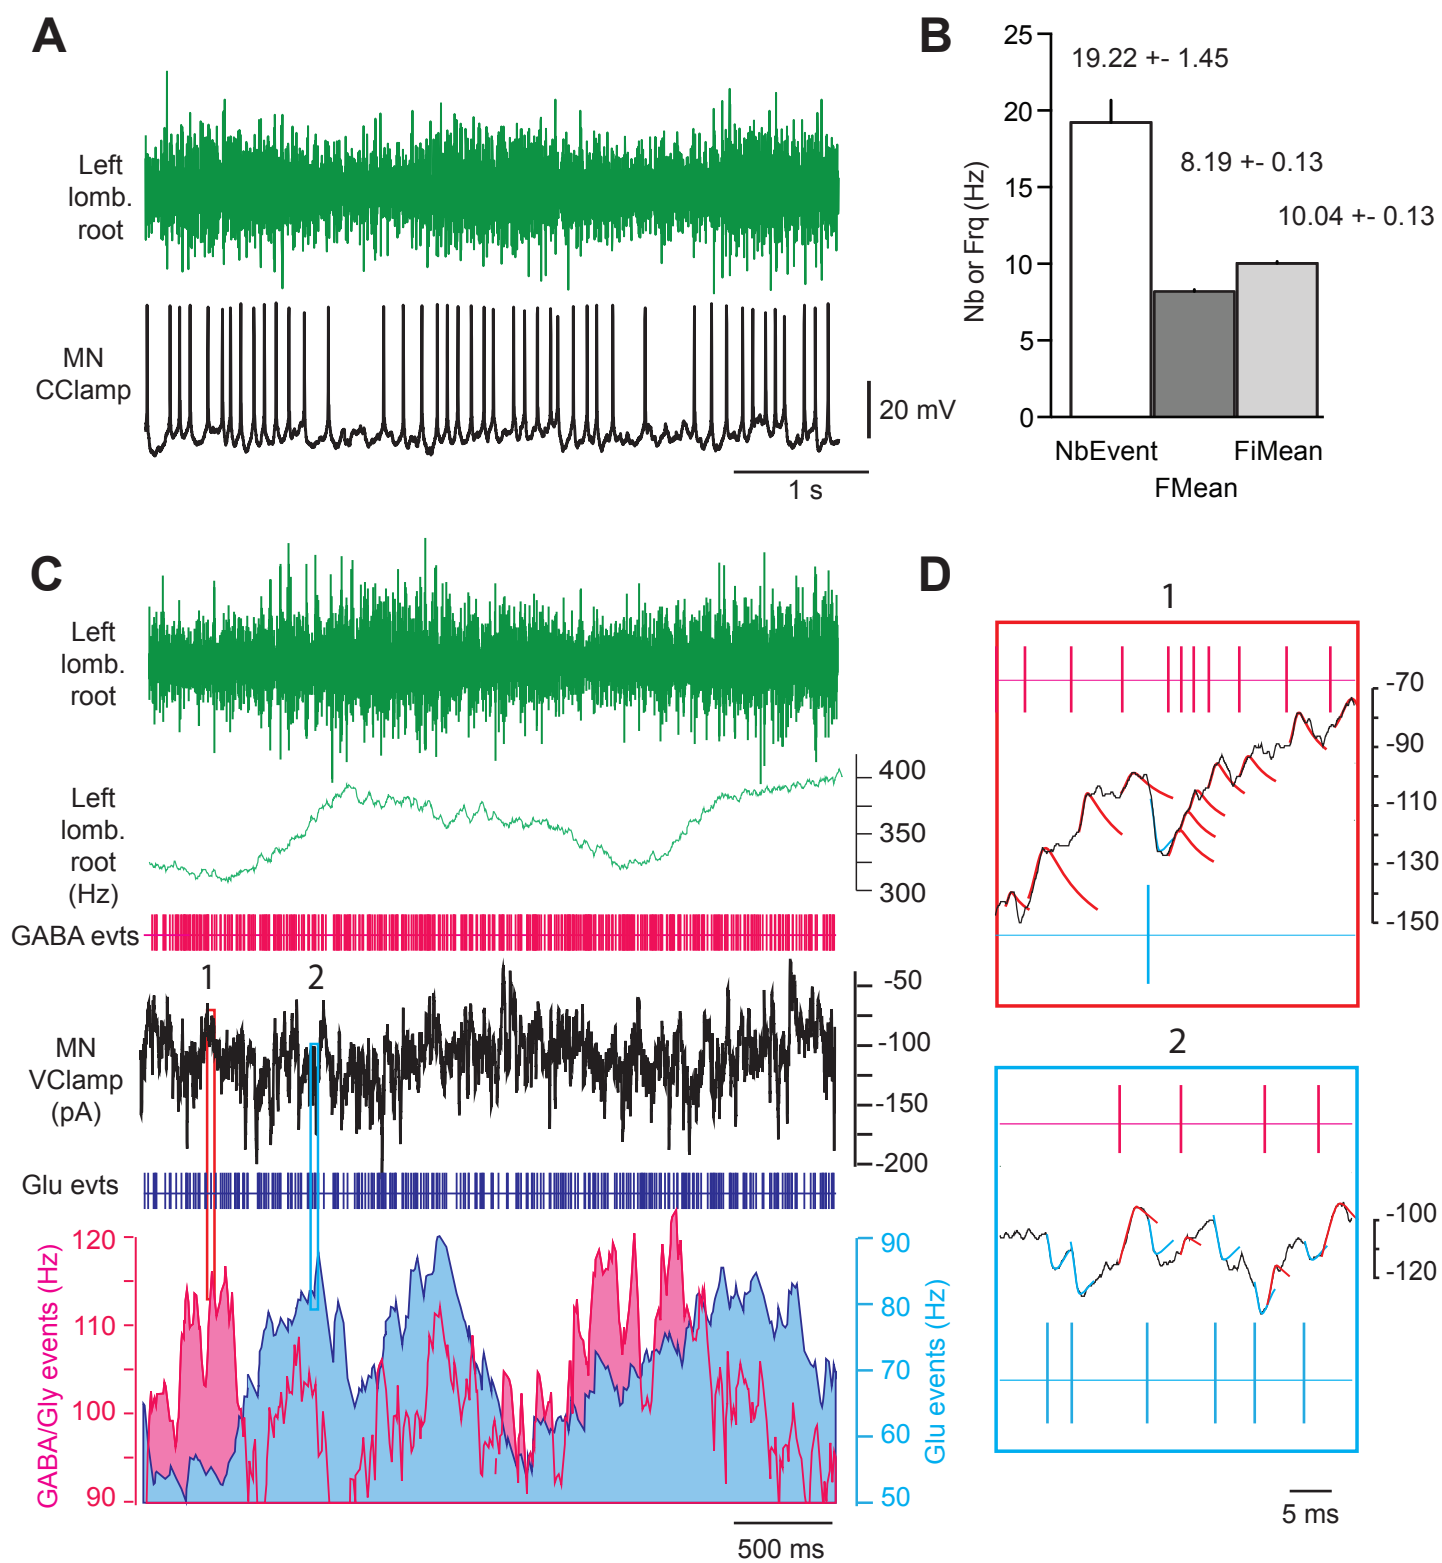

Branchereau et al. Figure 6 - Suppl. Figure 2

Supplement: supp [file elife-51402-supp-v1.zip › elife_poa_e51402_Figure_6_figure_supplement_2.pdf]

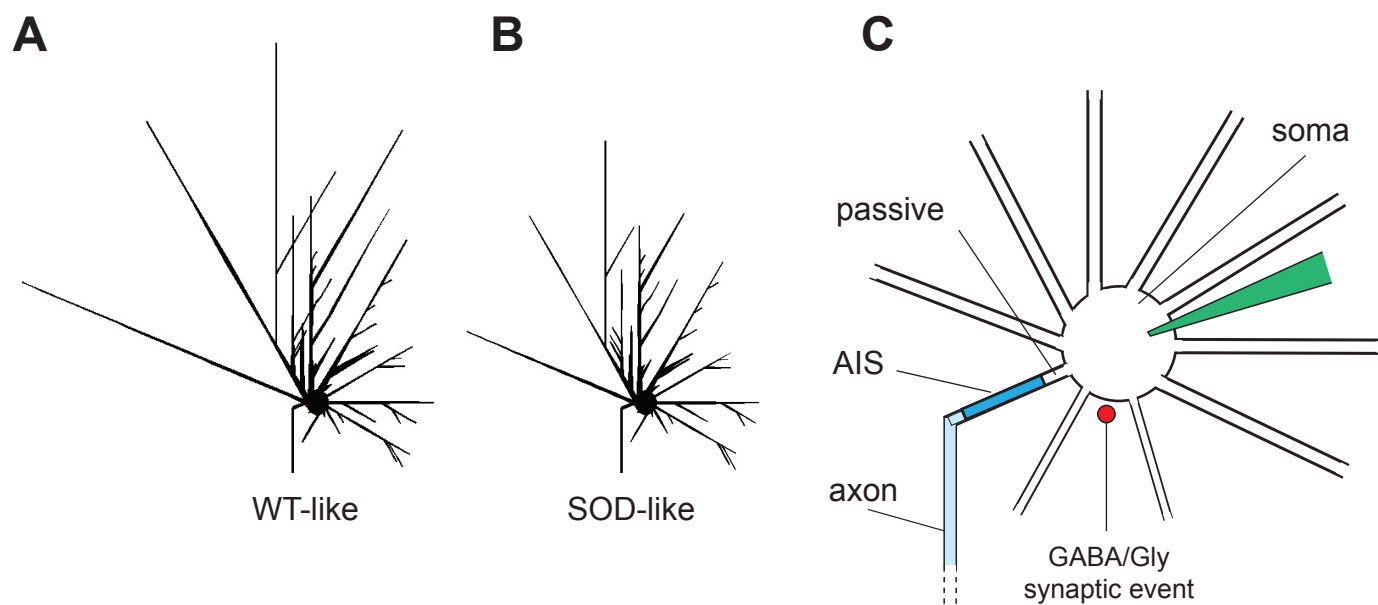

**Branchereau et al. Figure 6 - Suppl. Figure 1**

Supplement: supp [file elife-51402-supp-v1.zip › elife_poa_e51402_Figure_6_figure_supplement_1.pdf]
